# Supplementary material
Source: HighWire-hosted journal article supplement (https://qualitysafety.bmj.com/content/bmjqs-2020-010887)
Supplement: inline-supplementary-material-1 [file inline-supplementary-material-1.pdf]

Appendix A: Overview of Realist Synthesis Methods

Figure A.1: Realist Synthesis Methods

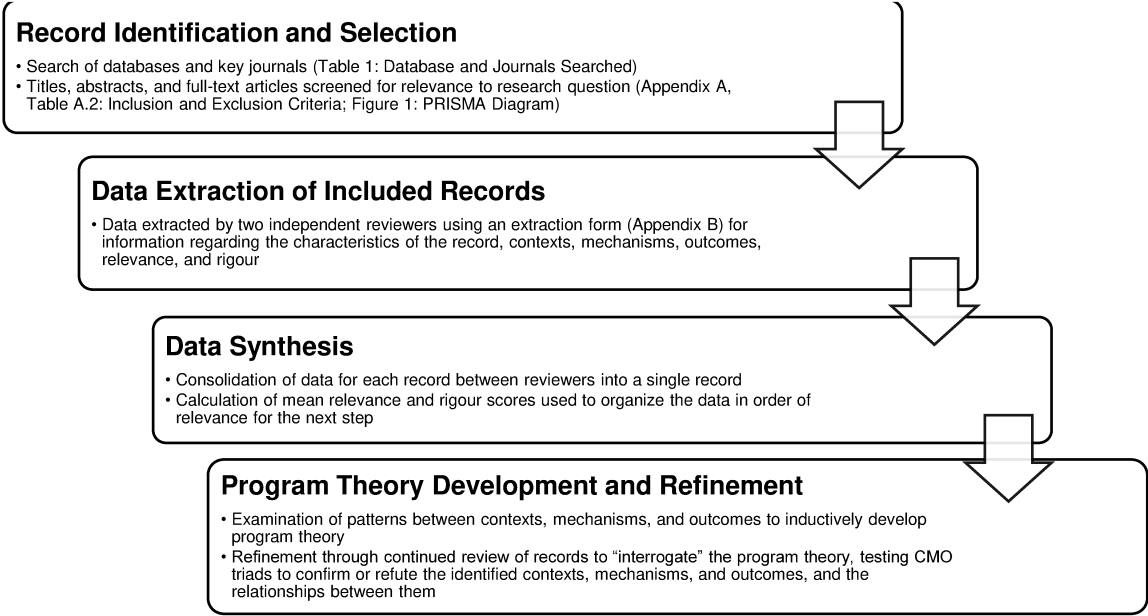

Table A.1: Database and Journals Searched with exploded Medical Subject Heading Terms for "Quality Improvement" AND "medical education"

| Databases Searched                                                                                                                                                                                    | Journals Manually Searched                                                                                                                                                                                                                                                                                                                                                                                                                                                                             |
|-------------------------------------------------------------------------------------------------------------------------------------------------------------------------------------------------------|--------------------------------------------------------------------------------------------------------------------------------------------------------------------------------------------------------------------------------------------------------------------------------------------------------------------------------------------------------------------------------------------------------------------------------------------------------------------------------------------------------|
| <ul style="list-style-type: none"><li>• MEDLINE</li><li>• PubMed</li><li>• Web of Science</li><li>• Embase</li><li>• CINAHL</li><li>• PsycInfo</li><li>• MedEdPortal</li><li>• MedEdPublish</li></ul> | <ul style="list-style-type: none"><li>• Academic Medicine</li><li>• Medical Education</li><li>• Medical Teacher</li><li>• Journal of Graduate Medical Education</li><li>• Teaching and Learning in Medicine</li><li>• Perspectives on Medical Education</li><li>• Advances in Health Sciences Education</li><li>• BMJ Quality and Safety</li><li>• BMJ Open Quality</li><li>• Quality and Safety in Healthcare</li><li>• American Journal of Medical Quality</li><li>• BMC Medical Education</li></ul> |

Appendix A: Overview of Realist Synthesis Methods

Table A.2: Inclusion and Exclusion Criteria

| Inclusion Criteria                                                                                                                                                                                                                                                                                                                                                                                                                                                                                                                                                                                                                                                                                            | Exclusion Criteria                                                                                                                                                                                                                                                                                                                                                                                                                                                                                                                                                                                        |
|---------------------------------------------------------------------------------------------------------------------------------------------------------------------------------------------------------------------------------------------------------------------------------------------------------------------------------------------------------------------------------------------------------------------------------------------------------------------------------------------------------------------------------------------------------------------------------------------------------------------------------------------------------------------------------------------------------------|-----------------------------------------------------------------------------------------------------------------------------------------------------------------------------------------------------------------------------------------------------------------------------------------------------------------------------------------------------------------------------------------------------------------------------------------------------------------------------------------------------------------------------------------------------------------------------------------------------------|
| <ul style="list-style-type: none"><li>• Medical (allopathic) programs granting a medical degree or accepted variant (i.e., MBBS, MB ChB)</li><li>• Programs targeting medical <u>learners at the undergraduate level (i.e., medical students, clinical clerks) or postgraduate level (i.e., residents, interns, house staff, fellows)</u><del>students or residents or fellows</del></li><li>• Programs delivered during undergraduate medical education (i.e., medical school) or postgraduate medical education (i.e., residency or fellowships)</li><li>• Programs that describe teaching QI methodologies (e.g., Model for Improvement, Lean, Six Sigma)</li><li>• Articles in English language</li></ul> | <ul style="list-style-type: none"><li>• Complementary or alternative medicine program (i.e., homeopathy, naturopathy)</li><li>• Programs exclusively targeting non-physician health professional students (i.e., nursing, allied health)</li><li>• Programs delivered prior to medical school or as a continuing medical education offering for practicing health professionals that did not involve medical learners</li><li>• Programs that describe teaching interventions not related to QI (i.e., principles of Quality Assurance only)</li><li>• Articles in languages other than English</li></ul> |
