# Supplementary material
Source: HighWire-hosted journal article supplement (https://qualitysafety.bmj.com/content/bmjqs-2020-010887)
Supplement: inline-supplementary-material-3 [file inline-supplementary-material-3.pdf]

## **Appendix C: Summary of Contexts, Mechanisms, and Outcomes**

## Appendix C: Summary of Contexts, Mechanisms, and Outcomes

| Contexts                   |                                                             | N                  | References                                                                                                                                                                                                                                                                                                                                                                                                                                                                              |
|----------------------------|-------------------------------------------------------------|--------------------|-----------------------------------------------------------------------------------------------------------------------------------------------------------------------------------------------------------------------------------------------------------------------------------------------------------------------------------------------------------------------------------------------------------------------------------------------------------------------------------------|
| <b>UGME</b>                | Pre-clerkship                                               | 15                 | (24)(25)(26)(27)(28)(29)(30)(31)(32)(33)(34)(35)(36)(37)(38)                                                                                                                                                                                                                                                                                                                                                                                                                            |
|                            | Clerkship                                                   | 15                 | (39)(40)(41)(42)(43)(44)(45)(46)(47)(48)(49)(50)(51)(52)(53)                                                                                                                                                                                                                                                                                                                                                                                                                            |
|                            | Longitudinal/combined                                       | 10                 | (54)(55)(56)(57)(58)(59)(60)(49)(61)(62)                                                                                                                                                                                                                                                                                                                                                                                                                                                |
| <b>PGME</b>                | Longitudinal curriculum                                     | 62                 | (63)(64)(65)(66)(67)(68)(69)(70)(71)(72)(73)(74)(75)(76)(77)(78)(79)(80)(81)(82)(83)(84)(85)(86)(87)(88)(89)(90)(91)(92)(93)(94)(95)(96)(97)(98)(99)(100)(101)(102)(103)(104)(105)(106)(107)(108)(109)(110)(111)(112)(113)(114)(115)(116)(117)(118)(119)(120)(121)(122)(123)(99)(124)                                                                                                                                                                                                   |
|                            | Block rotation                                              | 19                 | (68)(83)(125)(126)(127)(128)(129)(130)(131)(132)(133)(134)(135)(136)(137)(138)(139)(140)(141)                                                                                                                                                                                                                                                                                                                                                                                           |
|                            | QI/PS electives                                             | 8                  | (142)(72)(143)(144)(145)(146)(147)(80)                                                                                                                                                                                                                                                                                                                                                                                                                                                  |
|                            | Chief resident                                              | 10                 | (133)(142)(148)(149)(150)(151)(152)(153)(154)(155)                                                                                                                                                                                                                                                                                                                                                                                                                                      |
|                            | Fellowship or Certificate                                   | 3                  | (156)(157)(158)                                                                                                                                                                                                                                                                                                                                                                                                                                                                         |
|                            | Monthly QI-focused conferences                              | 6                  | (102)(151)(159)(160)(161)(162)                                                                                                                                                                                                                                                                                                                                                                                                                                                          |
|                            | <b>Setting</b>                                              | Ambulatory setting | 53                                                                                                                                                                                                                                                                                                                                                                                                                                                                                      |
| Inpatient setting          |                                                             | 8                  | (68)(147)(128)(189)(138)(190)(191)(192)                                                                                                                                                                                                                                                                                                                                                                                                                                                 |
| Non-clinical QI projects   |                                                             | 9                  | (30)(38)(57)(69)(79)(125)(193)(194)(195)                                                                                                                                                                                                                                                                                                                                                                                                                                                |
| <b>Culture and Support</b> | Pre-existing QI culture                                     | 12                 | (55)(56)(59)(77)(80)(103)(144)(169)(182)(196)(197)(198)                                                                                                                                                                                                                                                                                                                                                                                                                                 |
|                            | Healthcare system support                                   | 9                  | (141)(127)(196)(199)(200)(201)(202)(203)(204)                                                                                                                                                                                                                                                                                                                                                                                                                                           |
|                            | Medical school support                                      | 8                  | (55)(57)(77)(92)(96)(107)(121)(159)                                                                                                                                                                                                                                                                                                                                                                                                                                                     |
|                            | Curricula aligned with healthcare system priorities         | 31                 | (25)(39)(43)(62)(88)(112)(122)(128)(146)(147)(164)(169)(171)(173)(177)(182)(181)(191)(196)(205)(206)(199)(207)(208)(209)(210)(211)(212)(213)(200)(214)                                                                                                                                                                                                                                                                                                                                  |
| <b>Mechanisms</b>          |                                                             |                    |                                                                                                                                                                                                                                                                                                                                                                                                                                                                                         |
| <b>General Mechanisms</b>  | Structure, clear expectations, and deliverables             | 53                 | (38)(39)(49)(51)(60)(60)(65)(67)(68)(70)(71)(73)(74)(76)(78)(79)(80)(82)(84)(86)(87)(88)(89)(92)(93)(96)(98)(100)(108)(109)(111)(117)(122)(126)(127)(130)(164)(167)(168)(173)(175)(178)(189)(190)(207)(209)(201)(215)(216)(217)(218)(219)(220)(221)(217)(196)(222)(166)(209)(223)(71)(41)(142)(75)(167)(76)(77)(78)(79)(80)(126)(84)(169)(85)(86)(201)(171)(60)(88)(127)(129)(130)(132)(91)(96)(179)(138)(149)(101)(203)(224)(225)(108)(110)(111)(123)(48)(137)(186)(120)(140)(99)(124) |
|                            | Protected time                                              | 49                 | (30)(32)(33)(39)(40)(41)(48)(51)(56)(60)(60)(59)(70)(74)(76)(77)(78)(79)(80)(81)(82)(88)(92)(96)(98)(101)(110)(127)(128)(129)(142)(143)(149)(156)(157)(159)(163)(167)(168)(169)(170)(173)(177)(186)(189)(196)(199)(207)(209)(212)(213)(198)(201)(215)(216)(217)(219)(220)(223)(224)(226)(227)(228)(229)(230)(231)(59)(99)                                                                                                                                                               |
|                            | Mentorship                                                  | 66                 | (27)(38)(39)(51)(56)(69)(70)(71)(73)(74)(86)(87)(88)(89)(92)(93)(96)(100)(141)(126)(130)(147)(164)(178)(205)(194)(215)(226)(232)(225)                                                                                                                                                                                                                                                                                                                                                   |
|                            | Feedback                                                    | 29                 | (39)(68)(69)(88)(93)(108)(120)(159)(164)(165)(166)(167)(182)(190)(196)(206)(199)(201)(215)(216)(218)(222)(227)(229)(233)(234)                                                                                                                                                                                                                                                                                                                                                           |
|                            | Curriculum Leadership                                       | 26                 | (43)(51)(85)(98)(182)(206)(232)                                                                                                                                                                                                                                                                                                                                                                                                                                                         |
|                            | Faculty Credit                                              | 7                  | (24)(55)(68)(69)(80)(93)(127)(133)(142)(147)(152)(173)(176)(177)(182)(214)(215)(227)                                                                                                                                                                                                                                                                                                                                                                                                    |
|                            | Financial Support                                           | 18                 | (24)(55)(68)(69)(80)(93)(127)(133)(142)(147)(152)(173)(176)(177)(182)(214)(215)(227)                                                                                                                                                                                                                                                                                                                                                                                                    |
| <b>Learning Mechanisms</b> | Modules                                                     | 23                 | (235)(28)(29)(40)(42)(45)(46)(58)(69)(72)(78)(80)(88)(95)(102)(108)(112)(117)(129)(133)(188)(197)(236)                                                                                                                                                                                                                                                                                                                                                                                  |
|                            | Educational Resources                                       | 9                  | (56)(168)(193)(217)(226)(237)(238)(233)(124)                                                                                                                                                                                                                                                                                                                                                                                                                                            |
|                            | Flipped Classroom                                           | 9                  | (80)(167)(172)(180)(188)(206)(217)(236)(239)                                                                                                                                                                                                                                                                                                                                                                                                                                            |
|                            | Just-in-time Learning                                       | 13                 | (62)(67)(68)(71)(79)(84)(148)(220)(222)(238)(140)(99)(124)                                                                                                                                                                                                                                                                                                                                                                                                                              |
| <b>Project Mechanisms</b>  | Topics Identified by Learners without Screening or Guidance | 17                 | (38)(87)(105)(107)(110)(113)(116)(117)(120)(130)(132)(143)(167)(173)(220)(234)(238)                                                                                                                                                                                                                                                                                                                                                                                                     |
|                            | Topic Selected by Learners with Screening or Guidance       | 28                 | (24)(65)(70)(71)(73)(66)(76)(78)(80)(86)(88)(89)(104)(106)(141)(129)(134)(139)(147)(177)(189)(196)(199)(210)(194)(201)(218)(99)                                                                                                                                                                                                                                                                                                                                                         |
|                            | Topics Pre-Identified by Faculty/Staff                      | 19                 | (41)(43)(56)(74)(85)(92)(93)(96)(108)(144)(164)(178)(186)(208)(219)(222)(227)(140)(124)                                                                                                                                                                                                                                                                                                                                                                                                 |
|                            | Shared Project Within Learner Cohorts                       | 15                 | (50)(68)(123)(130)(151)(163)(174)(175)(184)(188)(191)(192)(211)(230)(240)                                                                                                                                                                                                                                                                                                                                                                                                               |
|                            | Frequent meetings                                           | 36                 | (60)(65)(68)(76)(77)(78)(82)(87)(91)(93)(95)(101)(106)(107)(119)(122)(141)(127)(167)(168)(177)(182)(183)(184)(189)(196)(207)(209)(211)(213)(218)(215)(232)(230)(237)(241)                                                                                                                                                                                                                                                                                                               |

### Appendix C: Summary of Contexts, Mechanisms, and Outcomes

|                                   |                                        |     |                                                                                                                                                                                                                                                                                                                                                                                                                                                                                                                                                                                                      |
|-----------------------------------|----------------------------------------|-----|------------------------------------------------------------------------------------------------------------------------------------------------------------------------------------------------------------------------------------------------------------------------------------------------------------------------------------------------------------------------------------------------------------------------------------------------------------------------------------------------------------------------------------------------------------------------------------------------------|
|                                   | Access to data                         | 26  | (48) (66) (68) (87) (91) (92) (94) (115) (130) (134) (136) (139) (146) (147) (159) (169) (173) (174) (175) (176) (184) (186) (187) (215) (219) (223)                                                                                                                                                                                                                                                                                                                                                                                                                                                 |
|                                   | Project handover                       | 8   | (39) (68) (92) (147) (170) (183) (190) (208)                                                                                                                                                                                                                                                                                                                                                                                                                                                                                                                                                         |
|                                   | Interprofessional teams                | 29  | (43) (77) (90) (93) (95) (106) (107) (141) (127) (128) (167) (175) (182) (183) (184) (186) (189) (190) (192) (196) (207) (209) (208) (200) (193) (201) (202) (220) (241)                                                                                                                                                                                                                                                                                                                                                                                                                             |
|                                   | Uni-professional teams                 | 55  | (27) (32) (33) (41) (60) (63) (64) (65) (66) (67) (68) (71) (74) (75) (78) (79) (81) (82) (84) (86) (87) (88) (89) (92) (100) (101) (102) (104) (105) (108) (110) (117) (121) (130) (132) (136) (147) (148) (164) (166) (168) (169) (171) (172) (177) (178) (210) (218) (219) (221) (223) (232) (231) (99) (124)                                                                                                                                                                                                                                                                                     |
|                                   | Incentives                             | 7   | (88) (96) (107) (117) (199) (212) (219)                                                                                                                                                                                                                                                                                                                                                                                                                                                                                                                                                              |
| <b>Outcomes</b>                   |                                        |     |                                                                                                                                                                                                                                                                                                                                                                                                                                                                                                                                                                                                      |
| <b>Educational Outcomes</b>       | 1: Reaction/Satisfaction               | 78  | (62) (63) (140) (205) (207) (206) (215) (217) (51) (196) (55) (121) (40) (222) (69) (226) (208) (237) (147) (229) (197) (148) (122) (143) (42) (167) (144) (236) (116) (78) (79) (188) (80) (125) (81) (83) (159) (232) (169) (44) (60) (173) (130) (130) (35) (45) (93) (133) (134) (193) (96) (239) (233) (64) (156) (135) (180) (46) (100) (157) (25) (138) (149) (238) (26) (161) (190) (151) (105) (29) (141) (47) (109) (110) (37) (230) (158) (115) (32)                                                                                                                                      |
|                                   | 2A: Attitudes                          | 36  | (38) (63) (65) (205) (215) (199) (216) (165) (228) (166) (56) (147) (229) (218) (163) (197) (220) (73) (79) (80) (169) (170) (172) (173) (35) (45) (95) (96) (58) (190) (28) (52) (184) (185) (213) (200)                                                                                                                                                                                                                                                                                                                                                                                            |
|                                   | 2B: Knowledge/Skills                   | 101 | (38) (38) (62) (63) (140) (65) (205) (206) (120) (207) (215) (164) (227) (165) (60) (217) (196) (198) (40) (139) (228) (222) (69) (209) (117) (223) (237) (137) (229) (163) (197) (71) (148) (72) (143) (74) (75) (42) (168) (167) (144) (236) (116) (78) (79) (188) (80) (81) (83) (126) (82) (84) (169) (170) (44) (86) (171) (60) (88) (172) (173) (128) (130) (91) (235) (35) (93) (174) (94) (95) (134) (193) (96) (239) (98) (233) (36) (64) (180) (181) (119) (157) (183) (145) (27) (190) (28) (67) (151) (29) (52) (54) (229) (204) (47) (109) (30) (185) (158) (213) (112) (113) (34) (32) |
|                                   | 3: Behaviours                          | 36  | (38) (62) (55) (205) (120) (207) (215) (199) (227) (217) (51) (196) (222) (226) (71) (41) (72) (143) (73) (78) (232) (87) (91) (235) (45) (202) (134) (160) (145) (203) (26) (146) (204) (162) (30) (154)                                                                                                                                                                                                                                                                                                                                                                                            |
| <b>Healthcare system Outcomes</b> | 4A: Changes to Organizational Practice | 68  | (215) (63) (68) (199) (209) (163) (143) (77) (82) (43) (187) (129) (130) (98) (176) (64) (211) (181) (182) (186) (203) (191) (106) (146) (200) (214) (114) (207) (62) (140) (65) (205) (206) (227) (222) (72) (219) (73) (240) (66) (167) (76) (159) (169) (85) (201) (171) (173) (128) (89) (210) (174) (96) (175) (118) (24) (100) (160) (26) (27) (225) (107) (158) (33) (152) (221) (136) (155)                                                                                                                                                                                                  |
|                                   | 4B: Changes to Organizational Outcomes | 35  | (215) (217) (223) (56) (229) (71) (219) (77) (189) (186) (190) (192) (106) (184) (115) (62) (140) (199) (227) (222) (208) (240) (78) (49) (84) (169) (171) (24) (100) (183) (110) (59) (53) (48) (155)                                                                                                                                                                                                                                                                                                                                                                                               |
